# Supplementary material for: Tuning functional sites and thermal stability of mixed-linker MOFs based on MIL-53(Al)
Source: Royal Society of Chemistry journal article supplement (doi:10.1039/c002483j), 2010-01-01
Supplement: c002483j.pdf [file c002483j.pdf]

## **Tuning functional sites and thermal stability of mixed-linker MOFs based on MIL-53(Al)**

Stefan Marx, Wolfgang Kleist,\* Jun Huang, Marek Maciejewski and Alfons Baiker\*

*Department of Chemistry and Applied Biosciences, ETH Zurich, Institute for Chemical and Bioengineering, CH-8093 Zurich, Switzerland*

*Email: wolfgang.kleist@chem.ethz.ch; baiker@chem.ethz.ch*

### **Experimental Details**

#### *General*

All chemicals were used without further purification or drying. *N,N*-dimethylformamide (DMF, > 99.8%), aluminum nitrate nonahydrate ( $\text{Al}(\text{NO}_3)_3 \times 9\text{H}_2\text{O}$ , > 98.0%) and benzene-1,4-dicarboxylate ( $\text{H}_2\text{BDC}$ , > 99.0%) were purchased from Fluka. 2-aminobenzene-1,4-dicarboxylate ( $\text{H}_2\text{ABDC}$ , > 99+%) was purchased from Acros Organics.

#### *Characterization of materials*

Powder X-ray diffraction patterns were recorded on a Siemens D5000 diffractometer equipped with a Ni filter using  $\text{Cu K}_\alpha$  radiation. Measurements were performed in the  $2\theta$  range between 5 and  $55^\circ$  with a step size of  $0.01^\circ$  and a step time of 2 seconds. Peak positions were adjusted using a copper plate ( $\text{Cu (111)}$  peak at  $43.3^\circ$ ) as a reference.

IR spectra have been recorded on a Bruker Vertex 70 equipped with a MCT detector cooled with liquid nitrogen. The spectra have been recorded in the range between 4000 and  $400\text{ cm}^{-1}$  with a resolution of  $2\text{ cm}^{-1}$  in the ATR mode. 500 scans have been collected for each sample.

$^{13}\text{C}$  CP MAS NMR investigations were carried out on a Bruker Advance 500 spectrometer at resonance frequency of 125.758 MHz with a 4 mm Bruker MAS probe at a sample spinning rate of 13-14 kHz. Spectra were recorded after an excitation with a  $\pi/2$  pulse with the contact time of 5 ms and with a repetition time of 2 s. The applied settings of the  $^{13}\text{C}$  CP MAS NMR allow for the monitoring of the relative changes caused by the different BDC / ABDC ratios.

Thermal analysis was carried out on a Netzsch STA 409 thermal analyzer equipped with a gas pulse device, which enables the injection of a certain amount of gas mixtures into the system. The experiments could be done under isothermal or non-isothermal conditions. The heating rates were generally in the range of  $5\text{-}10\text{ K min}^{-1}$ . The thermal stability of the MOFs was examined in an atmosphere of 20 vol%  $\text{O}_2$  in He, using a total gas flow of  $50\text{ cm}^3\text{ min}^{-1}$ .

### *Synthesis of MIL-53 and NH<sub>2</sub>-MIL-53*

In a typical experiment aluminum nitrate nonahydrate (2.0 g, 5.33 mmol, 1 eq.) was dissolved at RT in deionized water (23 cm<sup>3</sup>) in a teflon vessel. H<sub>2</sub>BDC (949 mg, 5.33 mmol, 1 eq.) was added to the resulting colorless solution and the suspension was stirred 5 minutes at r.t. The teflon inlet was placed in a stainless steel autoclave, sealed and left in a oven for 5 hours at 150 °C. The resulting colorless precipitate was filtered off and washed with water (100 cm<sup>3</sup>). The material was dried for 3.5 h at 130 °C yielding a colorless product. The raw material was then washed in boiling DMF for 2 h. The purified product was obtained after filtration and drying in a vacuum oven at 130°C.

The isoreticular NH<sub>2</sub>-MIL-53 was synthesized according to the above described procedure by using H<sub>2</sub>ABDC (966 mg, 5.33 mmol, 1 eq.) instead of H<sub>2</sub>BDC. The resulting yellow precipitate was treated analogous to the pure MIL-53.

### *Synthesis of mixed linker MIL-53*

A series of isoreticular metal organic framework was synthesized by using mixtures of the two linker molecules in the desired ratio. By variation of the ratio of H<sub>2</sub>ABDC and H<sub>2</sub>BDC one could obtain materials with different degrees of substitution. In this work materials with 0, 10, 50, 90 and 100 percent ABDC have been synthesized. The color of the ABDC substituted material was yellow, independent of the degree of substitution.

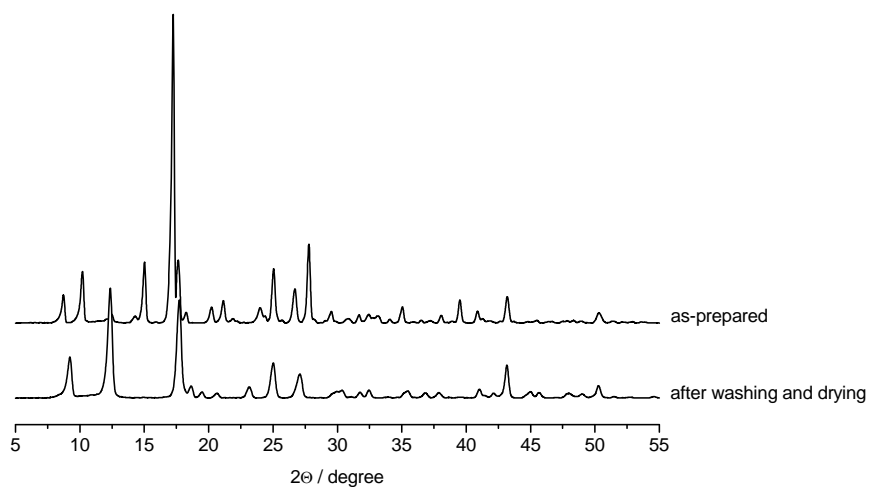

**Fig. S1** XRD powder diffraction pattern of the MIXMOF containing 10 % ABDC before (top) and after removal of residual acid molecules. A typical breathing effect is observed upon exchange of the acid molecules by water which is adsorbed from the air after drying.

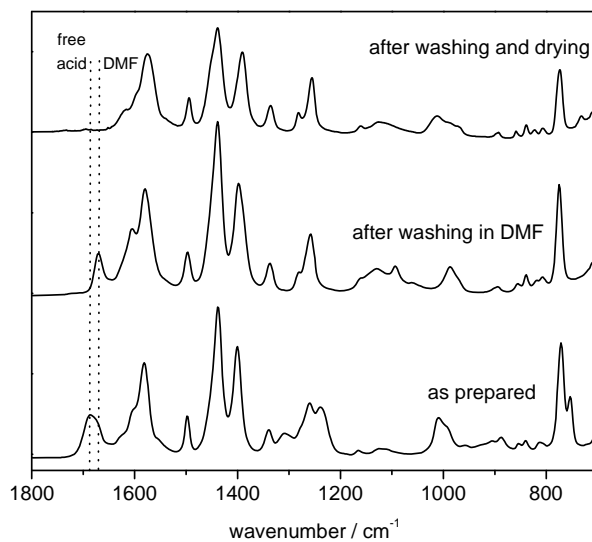

**Fig. S2** IR spectra of the sample  $\text{NH}_2\text{-MIL-53(Al)}$  (100 % ABDC) as-prepared (bottom), after washing in DMF (middle) and after washing and drying (top). The dotted lines show the position of the C=O vibration of the free acid and DMF, respectively.

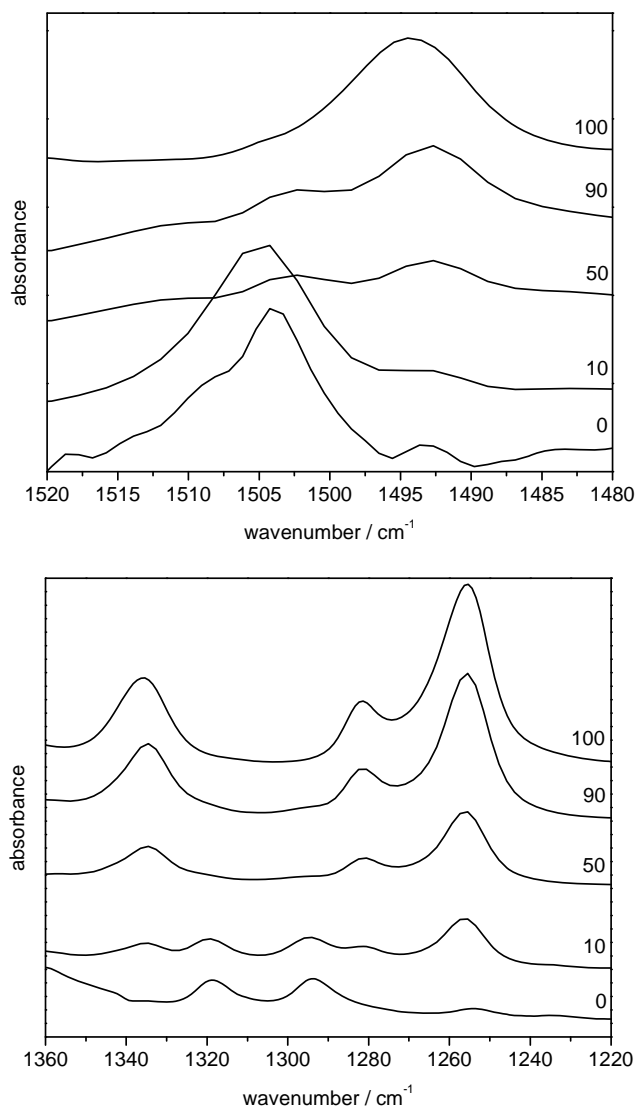

**Fig. S3** ATR-IR spectra of the MIXMOFs (0 – 100 % ABDC); regions from 1520 to 1480 cm<sup>-1</sup> (top) and 1360 – 1220 cm<sup>-1</sup>. Bands from BDC and ABDC appear at different wavenumbers due to the different substitution pattern at the aromatic ring. The intensity of the corresponding bands is dependent on the ABDC/BDC ratio in the MIXMOFs.
